# Supplementary material for: Visible-Light Radical–Radical Coupling vs. Radical Addition: Disentangling a Mechanistic Knot
Source: MDPI journal article supplement (doi:10.3390/catal11080922), 2021-07-29
Supplement: s1 [file s1]

# Supporting information for Visible-Light Radical-Radical Coupling Vs. Radical Addition: Disentangling a Mechanistic Knot

*Fernando Aguilar-Galindo<sup>1</sup>, Ricardo I. Rodríguez<sup>2</sup>, Leonardo Mollari<sup>2</sup>, José Alemán<sup>2,4,\*</sup>, and Sergio Díaz-Tendero<sup>3,4,5,\*</sup>*

<sup>1</sup> Donostia International Physics Center (DIPC), Donostia-San Sebastián, 20018, Spain.

<sup>2</sup> Organic Chemistry Department, Universidad Autónoma de Madrid, 28049 Madrid, Spain.

<sup>3</sup> Chemistry Department, Universidad Autónoma de Madrid, 28049 Madrid, Spain.

<sup>4</sup> Inst. for Advanced Research in Chemical Science (IAdChem), Universidad Autónoma de Madrid

<sup>5</sup> Condensed Matter Physics Center (IFIMAC), Universidad Autónoma de Madrid

## HAT reaction

In order to verify the absence of energetic barrier during the HAT process and thus, to discard that this step could be the rate-determining step of the proposed mechanisms, we have performed a relaxed scan in the reaction coordinate. To do this, we have started with the optimized structure of molecule **I** and we placed the DABCO in close to the H atom that is transferred. Then, we have calculated the energy at different C-H distances (relaxing all the other coordinates). As can be seen in the following figure, there is a single minimum (green arrow), which corresponds with the H already transferred.

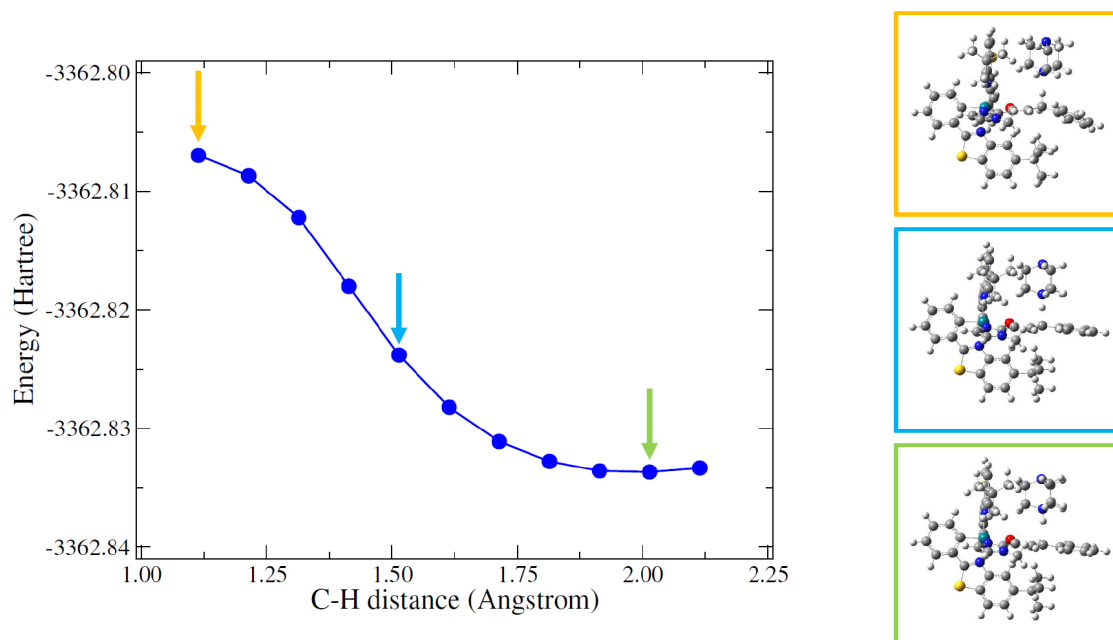

**Figure S1.** HAT reaction: Energy as a function of the C-H distance. Geometries at the points indicated with arrows are shown.

The critical points in the potential energy surface corresponding to the HAT reaction are given in the next figure. An intermediate is formed at  $146.50 \text{ kJ}\cdot\text{mol}^{-1}$ , and the final products lie  $60.57 \text{ kJ}\cdot\text{mol}^{-1}$  below the reactants.

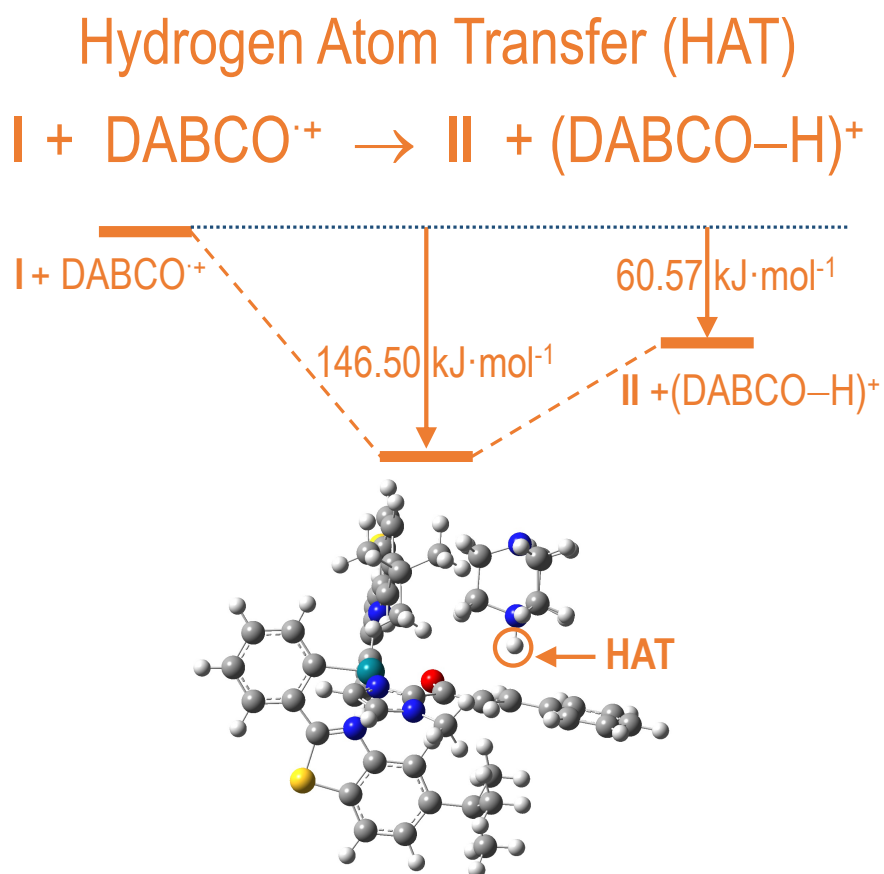

**Figure S2.** HAT reaction: Energy profile showing critical points. Geometry of the intermediate after hydrogen transfer is shown.

## Enantioselective Addition

The radical-radical coupling is an enantioselective process. Fig.1 in the main article shows the energy profile to produce the favored enantiomer; it corresponds to the green path in the following figure. The energy profile of the addition through the opposite face is shown in pink. A relaxed scan elongating the C-C distance from the non-favored product demonstrates that the reaction occurs without transition state achieving the product at much higher energy, 53.48 kJ·mol<sup>-1</sup> with respect to the reactants.

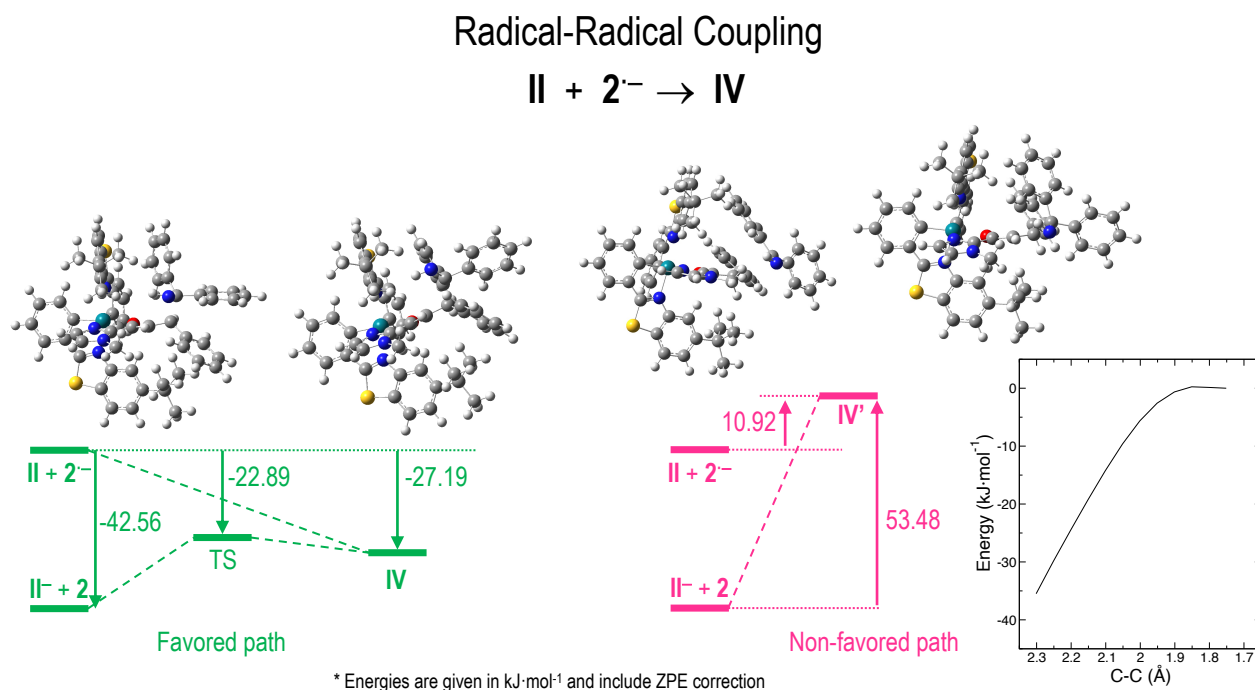

**Figure S3.** Enantioselective addition: Energy profile showing critical points of the favored and non-favored faces. Relaxed scan of the C-C bond which is being formed in the non-favored face is also given.

## Optimized geometries – x y z coordinates in Å.

I)

|   |             |             |             |
|---|-------------|-------------|-------------|
| C | -2.94792300 | 0.01502200  | -0.51515300 |
| C | -1.56773000 | 0.00633200  | -0.62873400 |
| C | -2.33286500 | 2.07621000  | -0.62449500 |
| N | -3.40412800 | 1.29075200  | -0.51343500 |
| H | -3.61276200 | -0.84523200 | -0.43623800 |
| H | -0.84736300 | -0.80784100 | -0.66478200 |
| C | 0.21938400  | 1.72171500  | -0.82144100 |
| H | 0.84244800  | 0.81991300  | -0.83724400 |
| H | 0.38643100  | 2.27786100  | -1.75278400 |
| H | 0.52490200  | 2.34146500  | 0.03119200  |
| N | -1.17702500 | 1.31400800  | -0.69802700 |
| C | -2.47213700 | 3.55877500  | -0.65836700 |
| O | -3.58496000 | 4.05067300  | -0.56948200 |
| C | -1.24533700 | 4.44328700  | -0.80525000 |
| H | -0.54798300 | 4.23031600  | 0.02187500  |
| H | -0.70725000 | 4.16092800  | -1.72547200 |
| C | -1.58554400 | 5.93813300  | -0.83225400 |
| H | -2.12547100 | 6.19609000  | 0.09175500  |
| H | -2.28290300 | 6.12934000  | -1.66224900 |
| C | -0.34758400 | 6.79351200  | -0.97571300 |
| C | 0.37344200  | 7.20987500  | 0.15585600  |
| C | 0.13761700  | 7.15098400  | -2.24457100 |
| C | 1.54503400  | 7.96258100  | 0.02502800  |
| H | 0.00870600  | 6.94233000  | 1.15218900  |
| C | 1.30874900  | 7.90376300  | -2.38066100 |
| H | -0.41253500 | 6.83721100  | -3.13681400 |
| C | 2.01749600  | 8.31190100  | -1.24515800 |
| H | 2.08946100  | 8.28028100  | 0.91834600  |
| H | 1.66752900  | 8.17518600  | -3.37713200 |
| H | 2.93150300  | 8.90225500  | -1.34935600 |

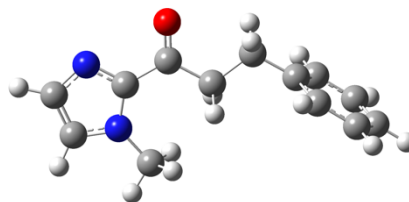

II)

|    |             |            |            |
|----|-------------|------------|------------|
| Rh | -0.89352600 | 1.52097800 | 0.36038600 |
| C  | -0.47973300 | 1.66907300 | 2.31689600 |
| C  | 0.44093700  | 2.52104200 | 2.94759100 |
| C  | -1.20062700 | 0.76423900 | 3.14529700 |
| C  | 0.63543800  | 2.47110000 | 4.33413700 |
| H  | 1.01756600  | 3.23543200 | 2.35495000 |
| C  | -1.00794100 | 0.71084100 | 4.53759300 |
| C  | -0.08615100 | 1.56988500 | 5.13307900 |
| H  | 1.35936600  | 3.14510500 | 4.80160400 |
| H  | -1.57351100 | 0.00160200 | 5.14903600 |
| H  | 0.07359400  | 1.54071600 | 6.21336900 |
| C  | -2.17144200 | 3.04480600 | 0.56619500 |
| C  | -1.63955700 | 4.31862300 | 0.21422300 |
| C  | -3.51517900 | 3.00099000 | 0.97167400 |
| C  | -2.41587600 | 5.49056800 | 0.26229100 |
| C  | -4.29001100 | 4.16682600 | 1.02119600 |
| H  | -3.96846700 | 2.04792800 | 1.25444100 |
| C  | -3.74639900 | 5.41275600 | 0.66901600 |

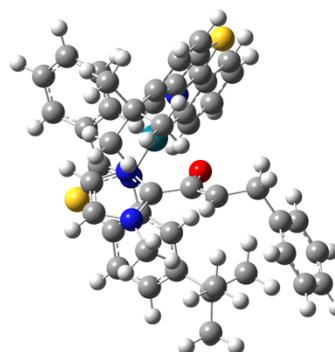

|   |             |             |             |
|---|-------------|-------------|-------------|
| H | -1.98104400 | 6.45450300  | -0.01777700 |
| H | -5.33451900 | 4.10595100  | 1.34076900  |
| H | -4.36118600 | 6.31464400  | 0.71284500  |
| C | -2.11324100 | -0.08013300 | 2.40133200  |
| C | -3.68269300 | -1.69928300 | 1.40639200  |
| C | -3.07404100 | -0.81140800 | 0.49228600  |
| C | -4.57513000 | -2.67938600 | 0.95900000  |
| C | -3.36371300 | -0.90175900 | -0.87749200 |
| C | -4.83105500 | -2.76374200 | -0.40727500 |
| H | -5.05175900 | -3.36827600 | 1.65900400  |
| C | -4.23099500 | -1.88818800 | -1.34824200 |
| H | -2.88258100 | -0.19217400 | -1.54040100 |
| H | -5.51675100 | -3.53952800 | -0.75329100 |
| C | -0.25532000 | 4.25449400  | -0.20887600 |
| C | 2.05299200  | 4.41762300  | -1.06440400 |
| C | 1.64767800  | 3.12147100  | -0.66835400 |
| C | 3.33112400  | 4.62879100  | -1.58274300 |
| C | 2.52177600  | 2.03555900  | -0.78539900 |
| C | 4.18679800  | 3.53082100  | -1.70507300 |
| H | 3.65684500  | 5.62367300  | -1.89263200 |
| C | 3.80490300  | 2.22625100  | -1.31367500 |
| H | 2.15776500  | 1.05958400  | -0.46283800 |
| H | 5.17927200  | 3.70880200  | -2.11778300 |
| S | -3.12369300 | -1.35894000 | 3.03474100  |
| S | 0.74300500  | 5.56089200  | -0.80602300 |
| N | 0.34684400  | 3.07834300  | -0.19293400 |
| N | -2.20137300 | 0.08331500  | 1.09170300  |
| C | 4.75180000  | 1.01711400  | -1.41591800 |
| C | 5.11799600  | 0.56519300  | 0.01608300  |
| H | 5.80704500  | -0.29268300 | -0.01716200 |
| H | 5.60534700  | 1.38283000  | 0.57142900  |
| H | 4.22590700  | 0.25001300  | 0.57758500  |
| C | 6.05098400  | 1.35194700  | -2.16905300 |
| H | 6.67723900  | 0.44920700  | -2.24278600 |
| H | 5.84886500  | 1.70404400  | -3.19324500 |
| H | 6.64374100  | 2.12188500  | -1.65069800 |
| C | 4.04589400  | -0.14082200 | -2.15693900 |
| H | 3.13336200  | -0.47391800 | -1.64346900 |
| H | 3.77121200  | 0.16171400  | -3.18085400 |
| H | 4.71112100  | -1.01559900 | -2.22003500 |
| C | -4.52285400 | -2.06084000 | -2.84926000 |
| C | -3.76302700 | -1.03280800 | -3.70592000 |
| H | -4.04220400 | 0.00175300  | -3.45516100 |
| H | -2.67299400 | -1.12742200 | -3.58640400 |
| H | -3.99569000 | -1.19133700 | -4.77030300 |
| C | -6.03665900 | -1.89020700 | -3.10507700 |
| H | -6.63322000 | -2.62891500 | -2.54836900 |
| H | -6.37338100 | -0.88523500 | -2.80410200 |
| H | -6.25989100 | -2.01955100 | -4.17664100 |
| C | -4.07676900 | -3.47478100 | -3.28743200 |
| H | -2.99883100 | -3.61542100 | -3.10712900 |
| H | -4.61806200 | -4.26459300 | -2.74472700 |
| H | -4.26655100 | -3.61810300 | -4.36367600 |
| C | 0.25445700  | -0.72867100 | -1.23091100 |

|   |             |             |             |
|---|-------------|-------------|-------------|
| C | 0.48997400  | -2.03631400 | -1.54674400 |
| H | 0.29395900  | -2.39146900 | -2.55833800 |
| O | 0.43665700  | -0.19143000 | -0.04241800 |
| C | 1.00203700  | -3.02839700 | -0.53550300 |
| C | -0.32637800 | 0.21332300  | -2.22167800 |
| N | -0.21572300 | 0.28118900  | -3.58014800 |
| C | -1.47150100 | 1.95953200  | -2.87518500 |
| C | -0.94300200 | 1.37982000  | -4.00357400 |
| H | -2.09250700 | 2.84718700  | -2.77986200 |
| H | -1.00892300 | 1.64847800  | -5.05443000 |
| N | -1.08085600 | 1.22521900  | -1.78612400 |
| C | 0.56128500  | -0.58616300 | -4.45382700 |
| H | 1.47820300  | -0.89737100 | -3.93754900 |
| H | -0.01377300 | -1.48083800 | -4.73634600 |
| H | 0.82614300  | -0.03007800 | -5.36204800 |
| H | 0.70652000  | -2.69883300 | 0.47246300  |
| H | 0.52698100  | -4.00938100 | -0.71413600 |
| C | 2.51123700  | -3.21268400 | -0.57358400 |
| C | 3.12938200  | -3.81613900 | -1.68297000 |
| C | 3.32486200  | -2.76819200 | 0.47851100  |
| C | 4.51645200  | -3.97293800 | -1.73781600 |
| H | 2.51066000  | -4.16508900 | -2.51529000 |
| C | 4.71489100  | -2.92737700 | 0.43114200  |
| H | 2.86269100  | -2.28857700 | 1.34581600  |
| C | 5.31707000  | -3.52894700 | -0.67734600 |
| H | 4.97669100  | -4.44543700 | -2.61007100 |
| H | 5.32931000  | -2.57294300 | 1.26275100  |
| H | 6.40265500  | -3.65028400 | -0.71753000 |

## II)

|    |             |             |             |
|----|-------------|-------------|-------------|
| Rh | -0.96260000 | 1.59855900  | 0.34723400  |
| C  | -0.56671600 | 1.84470600  | 2.30318300  |
| C  | 0.33823400  | 2.73412400  | 2.90497200  |
| C  | -1.29441500 | 0.97950300  | 3.16640900  |
| C  | 0.51159900  | 2.75649800  | 4.29497500  |
| H  | 0.92076700  | 3.42269600  | 2.28860700  |
| C  | -1.12420700 | 0.99898800  | 4.56276300  |
| C  | -0.21704400 | 1.89297200  | 5.12800900  |
| H  | 1.22438900  | 3.45838100  | 4.73782300  |
| H  | -1.69530800 | 0.31860700  | 5.20118500  |
| H  | -0.07426500 | 1.92000900  | 6.21070100  |
| C  | -2.29060400 | 3.08388300  | 0.47000600  |
| C  | -1.78649600 | 4.35949600  | 0.08713300  |
| C  | -3.64693600 | 3.00912100  | 0.82515200  |
| C  | -2.60248800 | 5.50493800  | 0.05772900  |
| C  | -4.46105900 | 4.14856500  | 0.79624800  |
| H  | -4.08090000 | 2.05347500  | 1.12770600  |
| C  | -3.94512000 | 5.39732900  | 0.41443600  |
| H  | -2.18925100 | 6.47156400  | -0.24470900 |
| H  | -5.51507800 | 4.06400600  | 1.07656800  |
| H  | -4.59066000 | 6.27832100  | 0.39626300  |
| C  | -2.19340400 | 0.09259600  | 2.45659200  |
| C  | -3.77565800 | -1.56206900 | 1.55005600  |

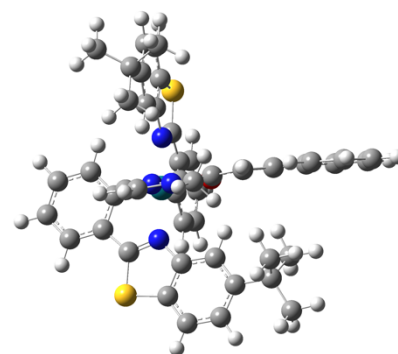

|   |             |             |             |
|---|-------------|-------------|-------------|
| C | -3.13166200 | -0.75645500 | 0.58449100  |
| C | -4.68853500 | -2.54860400 | 1.16355800  |
| C | -3.40330900 | -0.94419300 | -0.78025000 |
| C | -4.93405200 | -2.72257400 | -0.19536400 |
| H | -5.19169600 | -3.17132500 | 1.90568500  |
| C | -4.29776000 | -1.93564900 | -1.18894200 |
| H | -2.89331700 | -0.30171600 | -1.48839800 |
| H | -5.64199300 | -3.49822100 | -0.49312300 |
| C | -0.38196200 | 4.33200200  | -0.26680300 |
| C | 1.98335800  | 4.58832700  | -0.91112100 |
| C | 1.59349100  | 3.27072500  | -0.57316700 |
| C | 3.29793900  | 4.86316300  | -1.28945500 |
| C | 2.52602800  | 2.22634600  | -0.61388500 |
| C | 4.21138200  | 3.80772600  | -1.32887200 |
| H | 3.60919300  | 5.87683500  | -1.54895500 |
| C | 3.84944100  | 2.48084700  | -0.99807100 |
| H | 2.18390000  | 1.22965600  | -0.34258500 |
| H | 5.23327800  | 4.03626500  | -1.62922200 |
| S | -3.23787500 | -1.11928700 | 3.15918400  |
| S | 0.61499500  | 5.67943600  | -0.76254900 |
| N | 0.25523400  | 3.17449700  | -0.21771700 |
| N | -2.25293900 | 0.16567600  | 1.13623800  |
| C | 4.84497600  | 1.30865100  | -1.09739300 |
| C | 4.77639700  | 0.44121500  | 0.17900700  |
| H | 5.49324900  | -0.39249300 | 0.10815500  |
| H | 5.02598500  | 1.03481500  | 1.07317500  |
| H | 3.78098400  | -0.00088000 | 0.32421900  |
| C | 6.29645700  | 1.78887700  | -1.27408100 |
| H | 6.97218900  | 0.91982100  | -1.29814700 |
| H | 6.43920900  | 2.33897200  | -2.21702900 |
| H | 6.61372800  | 2.43972200  | -0.44362800 |
| C | 4.45498100  | 0.44740200  | -2.32156700 |
| H | 3.43333000  | 0.05378600  | -2.22018800 |
| H | 4.50902700  | 1.03914700  | -3.24959300 |
| H | 5.13832400  | -0.41210700 | -2.42084900 |
| C | -4.60115400 | -2.19867300 | -2.67484900 |
| C | -3.77995300 | -1.28627600 | -3.60141300 |
| H | -3.99687300 | -0.22116600 | -3.43308800 |
| H | -2.69775400 | -1.43465300 | -3.46608800 |
| H | -4.01807500 | -1.51150000 | -4.65253100 |
| C | -6.10199000 | -1.94468500 | -2.94155400 |
| H | -6.74356300 | -2.60032200 | -2.33312700 |
| H | -6.36860100 | -0.90057400 | -2.71207900 |
| H | -6.33891100 | -2.13376400 | -4.00127200 |
| C | -4.25512000 | -3.66643700 | -3.01455900 |
| H | -3.18857700 | -3.86972100 | -2.82703800 |
| H | -4.84634600 | -4.37959700 | -2.42055000 |
| H | -4.46029300 | -3.86846200 | -4.07840500 |
| C | 0.49263000  | -0.47480800 | -1.26680800 |
| C | 1.35319600  | -1.54213100 | -1.62870300 |
| H | 1.37347300  | -1.85539200 | -2.66947200 |
| O | 0.42074300  | -0.05514800 | -0.03310000 |
| C | 2.18390300  | -2.17565100 | -0.71804400 |
| C | -0.32510900 | 0.26779900  | -2.22523500 |

|   |             |             |             |
|---|-------------|-------------|-------------|
| N | -0.39513100 | 0.25012100  | -3.59963000 |
| C | -1.76160900 | 1.81556400  | -2.83356000 |
| C | -1.29745400 | 1.22436700  | -3.98400500 |
| H | -2.48283500 | 2.62045100  | -2.71300000 |
| H | -1.53130600 | 1.40173900  | -5.03017100 |
| N | -1.16407200 | 1.21315500  | -1.76311500 |
| C | 0.34721400  | -0.58398800 | -4.53135500 |
| H | 1.42910600  | -0.47171700 | -4.37158600 |
| H | 0.07179300  | -1.64253500 | -4.41662400 |
| H | 0.10672000  | -0.26809000 | -5.55346700 |
| H | 2.11949100  | -1.84324200 | 0.32144300  |
| C | 3.16923000  | -3.19320000 | -1.00815700 |
| C | 3.40803600  | -3.70716000 | -2.31129900 |
| C | 3.97358900  | -3.70501600 | 0.04429300  |
| C | 4.38828400  | -4.67092200 | -2.53890800 |
| H | 2.81944100  | -3.34096500 | -3.15550500 |
| C | 4.95364200  | -4.66845400 | -0.18825400 |
| H | 3.81697800  | -3.32528000 | 1.05818700  |
| C | 5.17078100  | -5.16182200 | -1.48265400 |
| H | 4.54844100  | -5.04544800 | -3.55398000 |
| H | 5.55616900  | -5.03899500 | 0.64585200  |
| H | 5.93925500  | -5.91653100 | -1.66716600 |

#### DABCO)

|   |             |             |             |
|---|-------------|-------------|-------------|
| C | -0.78298600 | -1.34612200 | -0.31974900 |
| C | 0.78300000  | -1.34606100 | -0.31997300 |
| H | -1.18333800 | -2.05310400 | 0.42520500  |
| H | -1.18360800 | -1.64272900 | -1.30289700 |
| H | 1.18363300  | -2.05324700 | 0.42463700  |
| H | 1.18335100  | -1.64232400 | -1.30333500 |
| C | -0.78297800 | 0.39613600  | 1.32563800  |
| H | -1.18329400 | 1.39477700  | 1.56545300  |
| H | -1.18358700 | -0.30698200 | 2.07407900  |
| C | 0.78297700  | 0.39592500  | 1.32570200  |
| H | 1.18355600  | 1.39437700  | 1.56586800  |
| H | 1.18332200  | -0.30754300 | 2.07395400  |
| C | 0.78297200  | 0.95014000  | -1.00573300 |
| H | 1.18328500  | 1.94989000  | -0.77061600 |
| H | 1.18357800  | 0.65890900  | -1.99048100 |
| C | -0.78298400 | 0.94996500  | -1.00588900 |
| H | -1.18357900 | 1.94969700  | -0.77117200 |
| H | -1.18331700 | 0.65832800  | -1.99062700 |
| N | -1.27941900 | -0.00000200 | -0.00000100 |
| N | 1.27941900  | 0.00001100  | -0.00000400 |

#### DABCO<sup>+</sup>H)

|   |             |             |             |
|---|-------------|-------------|-------------|
| C | 0.81753600  | -1.38454400 | 0.06364900  |
| C | -0.73887600 | -1.42853400 | 0.09343100  |
| H | 1.19650200  | -1.93241300 | -0.81016000 |
| H | 1.22676500  | -1.86430100 | 0.96355100  |
| H | -1.17412500 | -1.97493000 | -0.75252100 |
| H | -1.14377200 | -1.84235300 | 1.02575600  |
| C | 0.81909300  | 0.63667000  | -1.23015500 |

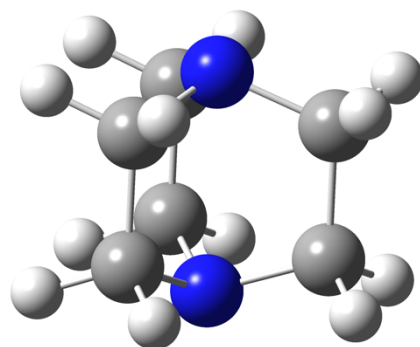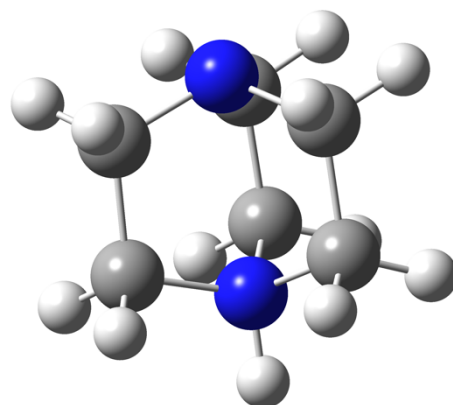



|   |             |             |             |
|---|-------------|-------------|-------------|
| H | 1.20001100  | 1.66657200  | -1.26762800 |
| H | 1.22764900  | 0.09626200  | -2.09522700 |
| C | -0.73713500 | 0.63559900  | -1.28387900 |
| H | -1.17127200 | 1.64218800  | -1.32879100 |
| H | -1.14149600 | 0.03988500  | -2.11184700 |
| C | -0.73838800 | 0.79462900  | 1.19017900  |
| H | -1.14205100 | 1.80963900  | 1.08472200  |
| H | -1.17395400 | 0.33268600  | 2.08503500  |
| C | 0.81789900  | 0.74629400  | 1.16669900  |
| H | 1.22744000  | 1.76540100  | 1.13254600  |
| H | 1.19688900  | 0.26330600  | 2.07799600  |
| N | 1.29001300  | -0.00078000 | 0.00021300  |
| N | -1.22145300 | 0.00009700  | -0.00133000 |
| H | -2.24657400 | -0.00065900 | -0.00182800 |

### DABCO<sup>2+</sup>)

|   |             |             |             |
|---|-------------|-------------|-------------|
| C | 0.81847200  | 1.13579300  | -0.77697900 |
| C | -0.81839500 | 1.13590400  | -0.77689800 |
| H | 1.18035700  | 2.06623400  | -0.32342500 |
| H | 1.18056200  | 1.05103200  | -1.80861500 |
| H | -1.18011700 | 2.06634700  | -0.32321800 |
| H | -1.18058800 | 1.05129300  | -1.80851000 |
| C | 0.81796800  | 0.10495600  | 1.37199300  |
| H | 1.17977100  | -0.75260000 | 1.95182600  |
| H | 1.18059100  | 1.04043200  | 1.81413700  |
| C | -0.81794200 | 0.10493000  | 1.37201000  |
| H | -1.17971400 | -0.75269300 | 1.95176600  |
| H | -1.18057400 | 1.04035500  | 1.81425500  |
| C | -0.81874800 | -1.24075000 | -0.59512100 |
| H | -1.18187400 | -2.09191100 | -0.00660000 |
| H | -1.18102900 | -1.31350400 | -1.62745400 |
| C | 0.81864400  | -1.24084800 | -0.59505400 |
| H | 1.18162800  | -2.09199300 | -0.00642200 |
| H | 1.18099200  | -1.31374600 | -1.62735400 |
| N | 1.22690500  | 0.00001400  | -0.00001400 |
| N | -1.22690600 | 0.00010700  | 0.00000200  |

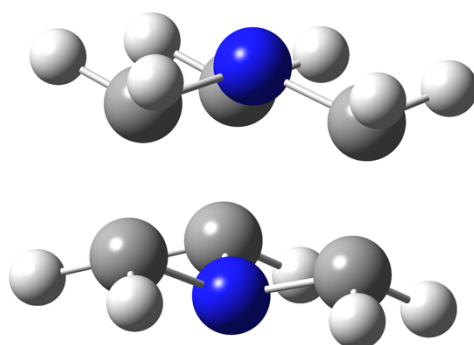

### 2)

|   |             |             |             |
|---|-------------|-------------|-------------|
| C | -0.86412600 | 0.94782200  | 0.06913500  |
| N | -0.26568900 | 2.08254800  | 0.12736300  |
| H | 0.74735500  | 1.94836100  | 0.21910400  |
| C | -0.13146400 | -0.36020200 | 0.08901100  |
| C | -0.55607300 | -1.41902100 | 0.91201900  |
| C | 1.03446400  | -0.52430200 | -0.68018800 |
| C | 0.17755500  | -2.60645400 | 0.97533300  |
| H | -1.46031900 | -1.30560400 | 1.51398200  |
| C | 1.75893900  | -1.71765800 | -0.62801200 |
| H | 1.36521400  | 0.28425100  | -1.33717900 |
| C | 1.33447500  | -2.76047000 | 0.20309400  |
| H | -0.15646500 | -3.41564700 | 1.62951700  |
| H | 2.65567800  | -1.83531300 | -1.24142400 |
| H | 1.90234700  | -3.69321400 | 0.24621300  |

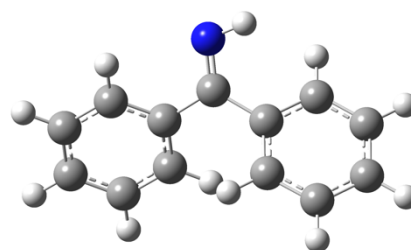

|   |             |             |             |
|---|-------------|-------------|-------------|
| C | -2.35836600 | 0.93251000  | -0.01450500 |
| C | -3.05452700 | -0.13044700 | -0.61801600 |
| C | -3.09265700 | 2.02599500  | 0.48239400  |
| C | -4.44852700 | -0.09984800 | -0.72288200 |
| H | -2.50364800 | -0.98247900 | -1.02068700 |
| C | -4.48410700 | 2.05143400  | 0.38678000  |
| H | -2.55051500 | 2.85131800  | 0.94713700  |
| C | -5.16737600 | 0.98789800  | -0.21753800 |
| H | -4.97391000 | -0.92983000 | -1.20186000 |
| H | -5.04107200 | 2.90262300  | 0.78674200  |
| H | -6.25761500 | 1.00777200  | -0.29248500 |

2<sup>-</sup>)

|   |             |             |             |
|---|-------------|-------------|-------------|
| C | -0.91168800 | 0.87187000  | 0.03428100  |
| N | -0.28624500 | 2.06377200  | 0.02345700  |
| H | 0.71437000  | 1.90497800  | 0.17845200  |
| C | -0.15981600 | -0.39449000 | 0.04657700  |
| C | -0.61021300 | -1.58511200 | 0.68828900  |
| C | 1.14966400  | -0.45221600 | -0.51937600 |
| C | 0.17432800  | -2.73441100 | 0.74552700  |
| H | -1.58287200 | -1.58737000 | 1.18419000  |
| C | 1.93029500  | -1.60543700 | -0.46382100 |
| H | 1.53568600  | 0.42956200  | -1.03793200 |
| C | 1.45661700  | -2.76647400 | 0.16658400  |
| H | -0.21029600 | -3.61857400 | 1.26413600  |
| H | 2.92211000  | -1.60392900 | -0.92785500 |
| H | 2.07001300  | -3.66992800 | 0.21312700  |
| C | -2.37876300 | 0.88323700  | 0.00533100  |
| C | -3.19263200 | -0.21104600 | -0.41399000 |
| C | -3.07610300 | 2.09075700  | 0.32125100  |
| C | -4.58134600 | -0.11731300 | -0.47132900 |
| H | -2.72025300 | -1.14297500 | -0.72975900 |
| C | -4.46424800 | 2.17772500  | 0.26291300  |
| H | -2.47618400 | 2.95238100  | 0.61834200  |
| C | -5.24435600 | 1.07524300  | -0.12637400 |
| H | -5.16062600 | -0.98465100 | -0.80495000 |
| H | -4.95350000 | 3.12158000  | 0.52739600  |
| H | -6.33437300 | 1.14486300  | -0.17141800 |

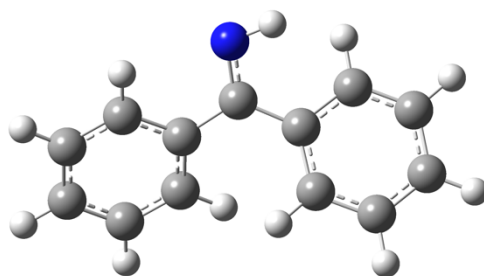

Ir<sup>III</sup>)

|    |             |             |             |
|----|-------------|-------------|-------------|
| Ir | 0.65818600  | -0.53749700 | -0.16460900 |
| C  | 1.63411900  | -1.42180500 | 1.38773000  |
| C  | 1.27376500  | -0.92894300 | 2.68691200  |
| C  | 2.58508200  | -2.45135900 | 1.29676200  |
| C  | 1.88193600  | -1.51465300 | 3.81473400  |
| C  | 0.30449600  | 0.17544900  | 2.74320100  |
| C  | 3.15040600  | -2.98638100 | 2.44916300  |
| H  | 2.88875800  | -2.85636000 | 0.33035900  |
| C  | 2.81537400  | -2.53828100 | 3.72606500  |
| C  | -0.24555300 | 0.75926400  | 3.90398100  |
| H  | 3.26484900  | -2.96424100 | 4.62248900  |
| C  | -0.92915600 | 1.66791500  | 1.41330100  |

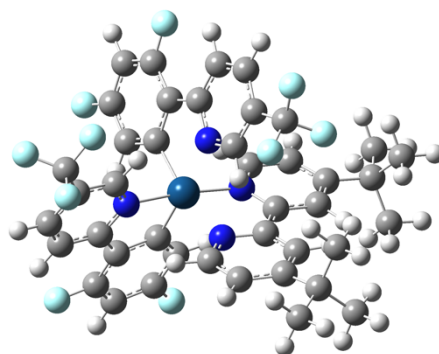

|   |             |             |             |
|---|-------------|-------------|-------------|
| C | -1.16111200 | 1.80010600  | 3.79368400  |
| H | 0.03754200  | 0.38990000  | 4.88460300  |
| C | -1.51161000 | 2.27161800  | 2.52410800  |
| H | -1.15846300 | 2.01398100  | 0.40550500  |
| H | -1.59632200 | 2.24710300  | 4.68902100  |
| N | -0.06768100 | 0.65382500  | 1.52051900  |
| F | 4.05328400  | -3.97476100 | 2.33961900  |
| F | 1.57746900  | -1.08781800 | 5.05697200  |
| C | -2.53470100 | 3.35236100  | 2.31114900  |
| F | -2.72721800 | 4.09002800  | 3.41580500  |
| F | -3.73409900 | 2.84082400  | 1.95974000  |
| F | -2.17172700 | 4.18880000  | 1.31632300  |
| C | 1.42703700  | -1.68160400 | -1.62254200 |
| C | 2.65473000  | -1.19515200 | -2.17803300 |
| C | 0.88604300  | -2.87814600 | -2.12218400 |
| C | 3.27521700  | -1.93647700 | -3.20150400 |
| C | 3.15557800  | 0.05164400  | -1.60629300 |
| C | 1.54690300  | -3.56535200 | -3.13301400 |
| H | -0.04602200 | -3.28783700 | -1.73133200 |
| C | 2.74625800  | -3.12022000 | -3.69435600 |
| C | 4.32817600  | 0.74293800  | -1.97206800 |
| H | 3.24989800  | -3.67344500 | -4.48629800 |
| C | 2.69085500  | 1.70180900  | 0.01033900  |
| C | 4.66823900  | 1.92503000  | -1.33107700 |
| H | 4.96319400  | 0.34381400  | -2.75734300 |
| C | 3.83343200  | 2.41881300  | -0.31890800 |
| H | 2.01617600  | 2.04157400  | 0.79513800  |
| H | 5.57808000  | 2.45957800  | -1.61097600 |
| N | 2.36052900  | 0.56026500  | -0.61268000 |
| C | 4.15864600  | 3.71212300  | 0.37670100  |
| F | 5.43886200  | 3.73706300  | 0.79210600  |
| F | 3.99895600  | 4.76808800  | -0.44549900 |
| F | 3.37804300  | 3.92118800  | 1.45032100  |
| F | 4.43149200  | -1.51096800 | -3.74730600 |
| F | 1.01993900  | -4.70921700 | -3.59956600 |
| C | -1.99664000 | 0.15951200  | -1.26801600 |
| C | -0.39539200 | 1.61654700  | -2.19847900 |
| C | -3.02545800 | 1.01432000  | -1.75763100 |
| C | -2.21648100 | -1.02293300 | -0.49734500 |
| C | -1.36679000 | 2.45988400  | -2.71553500 |
| H | 0.66587200  | 1.83694400  | -2.34306200 |
| C | -2.74326200 | 2.17749200  | -2.45306000 |
| H | -4.05809300 | 0.76404200  | -1.51692200 |
| C | -3.48563000 | -1.63273000 | -0.29359400 |
| H | -1.05136000 | 3.33381400  | -3.28110600 |
| C | -1.23527100 | -2.75109700 | 0.78040300  |
| C | -3.63910000 | -2.79916500 | 0.43561800  |
| H | -4.35498500 | -1.16223700 | -0.75243700 |
| C | -2.45313200 | -3.37700800 | 0.98279100  |
| H | -0.31761300 | -3.16892000 | 1.19838300  |
| H | -2.46969200 | -4.29593900 | 1.56438500  |
| N | -0.67071800 | 0.52127600  | -1.47411300 |
| N | -1.09160500 | -1.61060600 | 0.08090900  |
| C | -5.03312600 | -3.42344900 | 0.62141400  |

|   |             |             |             |
|---|-------------|-------------|-------------|
| C | -4.98338400 | -4.70601600 | 1.47061200  |
| H | -5.99884100 | -5.11698800 | 1.58283000  |
| H | -4.36013700 | -5.48294000 | 1.00105900  |
| H | -4.58879300 | -4.51201800 | 2.48020500  |
| C | -5.95723300 | -2.40672200 | 1.32963400  |
| H | -5.55459800 | -2.13328400 | 2.31810700  |
| H | -6.07243700 | -1.48223400 | 0.74366400  |
| H | -6.96083100 | -2.83885400 | 1.47604300  |
| C | -5.62419300 | -3.77866100 | -0.76194400 |
| H | -4.97868400 | -4.49779200 | -1.29116400 |
| H | -6.62155900 | -4.23406200 | -0.64658800 |
| H | -5.73387600 | -2.88855600 | -1.39995400 |
| C | -3.87221500 | 3.15217400  | -2.82868100 |
| C | -4.39351600 | 3.80060800  | -1.52351300 |
| H | -5.19539400 | 4.52420500  | -1.74609000 |
| H | -4.79476300 | 3.04455600  | -0.83132900 |
| H | -3.58484800 | 4.33104200  | -0.99672800 |
| C | -5.02555100 | 2.40180100  | -3.52882500 |
| H | -5.46961000 | 1.62832000  | -2.88464800 |
| H | -5.82890500 | 3.10680400  | -3.79735200 |
| H | -4.67452200 | 1.91470700  | -4.45262200 |
| C | -3.38272500 | 4.26813800  | -3.76927100 |
| H | -2.61739100 | 4.89997300  | -3.29319200 |
| H | -2.96003700 | 3.85783900  | -4.70007300 |
| H | -4.22594900 | 4.92205500  | -4.04131200 |

**Ir<sup>III</sup>)**

|    |             |             |             |
|----|-------------|-------------|-------------|
| Ir | 0.51134100  | -0.57886100 | -0.10663800 |
| C  | 1.58613800  | -1.46138700 | 1.37730800  |
| C  | 1.57556000  | -0.76747500 | 2.63069800  |
| C  | 2.30075300  | -2.66257700 | 1.26946600  |
| C  | 2.28631800  | -1.33150100 | 3.70884000  |
| C  | 0.81863800  | 0.49069600  | 2.69625600  |
| C  | 2.98229800  | -3.16809100 | 2.37309100  |
| H  | 2.33434900  | -3.22285000 | 0.33462600  |
| C  | 2.99209800  | -2.52242600 | 3.60752200  |
| C  | 0.63871000  | 1.30725900  | 3.83183100  |
| H  | 3.53027500  | -2.92701100 | 4.46407300  |
| C  | -0.46732000 | 1.98873000  | 1.42185200  |
| C  | -0.11056000 | 2.47341000  | 3.73861200  |
| H  | 1.07948300  | 1.02141000  | 4.78154700  |
| C  | -0.67597100 | 2.82919900  | 2.50799600  |
| H  | -0.89147900 | 2.22752000  | 0.44736100  |
| H  | -0.25892200 | 3.10023800  | 4.62011700  |
| N  | 0.24811600  | 0.86215300  | 1.51437800  |
| F  | 3.65787100  | -4.31915100 | 2.25177700  |
| F  | 2.30939100  | -0.71963100 | 4.90700100  |
| C  | -1.46875400 | 4.09934300  | 2.34930400  |
| F  | -0.66897900 | 5.18145700  | 2.30867800  |
| F  | -2.31709100 | 4.27839200  | 3.37629600  |
| F  | -2.19380900 | 4.09836800  | 1.21457800  |
| C  | 0.90630700  | -1.95226200 | -1.53196200 |
| C  | 2.10805400  | -1.70685100 | -2.26600400 |

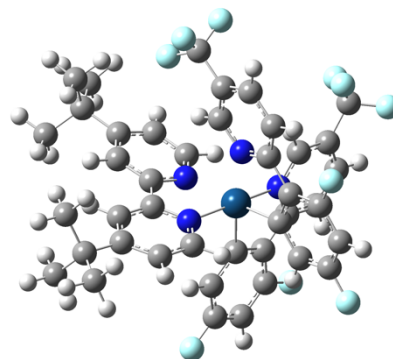

|   |             |             |             |
|---|-------------|-------------|-------------|
| C | 0.13431900  | -3.07940900 | -1.84568600 |
| C | 2.47591100  | -2.61177300 | -3.27970800 |
| C | 2.85625100  | -0.51413800 | -1.87681800 |
| C | 0.55054300  | -3.93938400 | -2.85773300 |
| H | -0.78980500 | -3.31232600 | -1.31558800 |
| C | 1.71830900  | -3.73146900 | -3.59243600 |
| C | 4.06573200  | -0.05445300 | -2.43288800 |
| H | 2.02897000  | -4.41541800 | -4.38150600 |
| C | 2.85079800  | 1.31416300  | -0.38814300 |
| C | 4.65851900  | 1.10372200  | -1.95113600 |
| H | 4.53226000  | -0.61380600 | -3.23817800 |
| C | 4.04008400  | 1.80563600  | -0.90842700 |
| H | 2.34248600  | 1.82306600  | 0.42920600  |
| H | 5.59900600  | 1.45764200  | -2.37762400 |
| N | 2.27574400  | 0.19596900  | -0.85809000 |
| C | 4.63751800  | 3.08251700  | -0.37982800 |
| F | 5.96169700  | 2.95677800  | -0.18307000 |
| F | 4.46677400  | 4.10052600  | -1.24498800 |
| F | 4.08291600  | 3.45303800  | 0.78659000  |
| F | 3.59938300  | -2.41623800 | -3.99302600 |
| F | -0.19526600 | -5.01521100 | -3.14598900 |
| C | -2.15741800 | 0.28398300  | -1.10825300 |
| C | -0.52018700 | 1.45374400  | -2.27221900 |
| C | -3.15023600 | 1.09373400  | -1.65781500 |
| C | -2.42524200 | -0.81108400 | -0.14806800 |
| C | -1.46818300 | 2.29026500  | -2.85668000 |
| H | 0.54358800  | 1.57269500  | -2.48573100 |
| C | -2.82521700 | 2.14352400  | -2.53341500 |
| H | -4.18745000 | 0.92747300  | -1.37380700 |
| C | -3.70517300 | -1.27364400 | 0.15041800  |
| H | -1.11941200 | 3.06198700  | -3.54008800 |
| C | -1.50265600 | -2.37402600 | 1.31247600  |
| C | -3.91075900 | -2.32169400 | 1.06213900  |
| H | -4.55716500 | -0.81414600 | -0.34664400 |
| C | -2.75940300 | -2.86979900 | 1.64427200  |
| H | -0.59822700 | -2.79267500 | 1.75360400  |
| H | -2.80939600 | -3.68783900 | 2.36010700  |
| N | -0.84900200 | 0.49211400  | -1.40117800 |
| N | -1.32903100 | -1.36889200 | 0.43918700  |
| C | -5.33060900 | -2.80941700 | 1.36921300  |
| C | -5.33551300 | -3.95216200 | 2.39835900  |
| H | -6.37188300 | -4.26808400 | 2.59041500  |
| H | -4.78216500 | -4.83227900 | 2.03573000  |
| H | -4.89997900 | -3.63867100 | 3.35986300  |
| C | -6.15318900 | -1.62804200 | 1.93445000  |
| H | -5.70280400 | -1.24199900 | 2.86236500  |
| H | -6.22824700 | -0.79588300 | 1.21813700  |
| H | -7.17666900 | -1.96391100 | 2.16336900  |
| C | -5.97815000 | -3.31661000 | 0.05962800  |
| H | -5.40077100 | -4.15101400 | -0.36834800 |
| H | -6.99919000 | -3.67468200 | 0.26455200  |
| H | -6.04911300 | -2.52402500 | -0.70057100 |
| C | -3.92194400 | 3.08470500  | -3.04226300 |
| C | -4.53330100 | 3.80832100  | -1.81766700 |

|   |             |            |             |
|---|-------------|------------|-------------|
| H | -5.30097800 | 4.52385200 | -2.15165900 |
| H | -5.01249600 | 3.10284700 | -1.12187400 |
| H | -3.76202300 | 4.36230700 | -1.25954200 |
| C | -5.01326800 | 2.26373500 | -3.76534800 |
| H | -5.48222400 | 1.52043600 | -3.10313100 |
| H | -5.80804100 | 2.93645600 | -4.12353900 |
| H | -4.59533000 | 1.73267500 | -4.63490100 |
| C | -3.37003600 | 4.13915300 | -4.01606400 |
| H | -2.61898000 | 4.78613700 | -3.53704400 |
| H | -2.91501000 | 3.67555300 | -4.90523000 |
| H | -4.19135300 | 4.78528400 | -4.36062300 |

#### IV)

|    |             |             |             |
|----|-------------|-------------|-------------|
| Rh | -0.38328600 | 1.99292500  | 0.36946600  |
| C  | 0.33486800  | 2.52413500  | 2.17302100  |
| C  | 1.52172800  | 3.21160700  | 2.47348800  |
| C  | -0.51628400 | 2.19458800  | 3.26668100  |
| C  | 1.84425800  | 3.55288000  | 3.79402200  |
| H  | 2.20808700  | 3.49074500  | 1.66993300  |
| C  | -0.20140100 | 2.54295400  | 4.59200900  |
| C  | 0.98507000  | 3.22633000  | 4.85501500  |
| H  | 2.77802400  | 4.08414100  | 4.00109500  |
| H  | -0.87475000 | 2.27367700  | 5.41110900  |
| H  | 1.24528400  | 3.50082300  | 5.87993500  |
| C  | -1.39778300 | 3.72542600  | 0.40049700  |
| C  | -0.72980000 | 4.81015000  | -0.23577800 |
| C  | -2.67733100 | 3.98466300  | 0.91935700  |
| C  | -1.30466400 | 6.08995200  | -0.33480400 |
| C  | -3.25414700 | 5.25748500  | 0.81980600  |
| H  | -3.24484800 | 3.19141400  | 1.40953100  |
| C  | -2.57182900 | 6.31493100  | 0.19900600  |
| H  | -0.76510400 | 6.90139600  | -0.83188500 |
| H  | -4.25230300 | 5.42848200  | 1.23356400  |
| H  | -3.03076600 | 7.30378000  | 0.12963100  |
| C  | -1.68730800 | 1.44285800  | 2.86295000  |
| C  | -3.72716400 | 0.10819700  | 2.49429600  |
| C  | -2.90644200 | 0.28112700  | 1.35972200  |
| C  | -4.86651400 | -0.70018800 | 2.43089300  |
| C  | -3.20956300 | -0.38555900 | 0.16472000  |
| C  | -5.14520200 | -1.35527400 | 1.23416000  |
| H  | -5.50580900 | -0.84031900 | 3.30451400  |
| C  | -4.31531000 | -1.23112700 | 0.09046800  |
| H  | -2.53766100 | -0.24947200 | -0.67154100 |
| H  | -6.02149900 | -2.00526300 | 1.19661000  |
| C  | 0.55581000  | 4.44089200  | -0.79112400 |
| C  | 2.72028300  | 4.09109400  | -1.91806200 |
| C  | 2.17433500  | 2.94511300  | -1.29205100 |
| C  | 3.93028100  | 4.01101700  | -2.60795200 |
| C  | 2.83821400  | 1.71626800  | -1.36311000 |
| C  | 4.57390900  | 2.77261100  | -2.67736200 |
| H  | 4.36289100  | 4.88932000  | -3.09104800 |
| C  | 4.04334500  | 1.61151700  | -2.06960700 |
| H  | 2.36965800  | 0.86734900  | -0.86419200 |

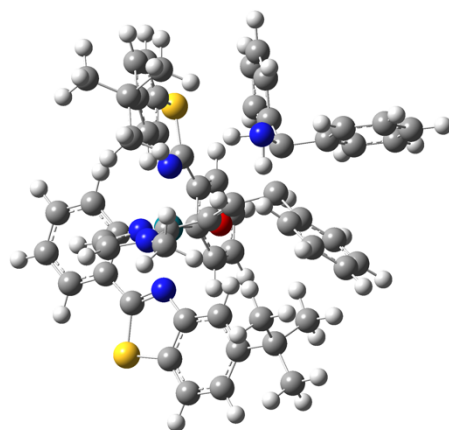

|   |             |             |             |
|---|-------------|-------------|-------------|
| H | 5.51265100  | 2.72200300  | -3.22813300 |
| S | -3.02558400 | 0.93918800  | 3.87159700  |
| S | 1.65449800  | 5.46776500  | -1.68509800 |
| N | 0.96168100  | 3.19029800  | -0.66301500 |
| N | -1.79319100 | 1.07305200  | 1.59687000  |
| C | 4.71664700  | 0.23200500  | -2.17502800 |
| C | 4.98107200  | -0.31596000 | -0.75474500 |
| H | 5.47871600  | -1.29542100 | -0.81250200 |
| H | 5.62656200  | 0.37160300  | -0.18431400 |
| H | 4.04689800  | -0.45910900 | -0.19214900 |
| C | 6.05707800  | 0.28741600  | -2.92756500 |
| H | 6.49643300  | -0.72141400 | -2.97036200 |
| H | 5.93218700  | 0.63710200  | -3.96454100 |
| H | 6.78311400  | 0.94747200  | -2.42633400 |
| C | 3.76699400  | -0.72448200 | -2.93337100 |
| H | 2.80540100  | -0.84308000 | -2.41316900 |
| H | 3.56517200  | -0.34443800 | -3.94854700 |
| H | 4.21282700  | -1.72727600 | -3.01684100 |
| C | -4.61692200 | -2.05089600 | -1.17642300 |
| C | -3.61133600 | -1.75249500 | -2.30342800 |
| H | -3.63232200 | -0.69435400 | -2.60754900 |
| H | -2.58318500 | -2.00132900 | -1.99980000 |
| H | -3.85424100 | -2.36006800 | -3.18897200 |
| C | -6.03774300 | -1.71997800 | -1.68274400 |
| H | -6.80867400 | -1.96419800 | -0.93589600 |
| H | -6.12787700 | -0.64905500 | -1.92667300 |
| H | -6.26216800 | -2.29843300 | -2.59372100 |
| C | -4.51748400 | -3.55631100 | -0.83634900 |
| H | -3.49425300 | -3.82239200 | -0.52794000 |
| H | -5.20585100 | -3.84059000 | -0.02559100 |
| H | -4.77437300 | -4.16078300 | -1.72207100 |
| C | 0.24142600  | -0.61872300 | -0.99568000 |
| C | 0.40717600  | -1.95314500 | -1.23295400 |
| H | -0.06878400 | -2.36916000 | -2.11648000 |
| O | 0.66535700  | 0.06080100  | 0.05889800  |
| C | 1.16826200  | -2.95165700 | -0.41975000 |
| C | -0.51233100 | 0.20706300  | -1.97325500 |
| N | -0.77193600 | 0.03423500  | -3.30680000 |
| C | -1.68634400 | 1.93583100  | -2.64068500 |
| C | -1.52246000 | 1.11722400  | -3.73124300 |
| H | -2.20127600 | 2.89035100  | -2.56075300 |
| H | -1.85686300 | 1.20828800  | -4.76121900 |
| N | -1.05623600 | 1.35937400  | -1.57039800 |
| C | -0.33084400 | -1.04115000 | -4.18258500 |
| H | 0.69954300  | -1.32518800 | -3.93396100 |
| H | -0.97701500 | -1.92603400 | -4.08066500 |
| H | -0.37160800 | -0.68746800 | -5.22060600 |
| H | 1.61936900  | -2.44564600 | 0.44235600  |
| C | 2.30811800  | -3.54032700 | -1.22555100 |
| C | 2.09319800  | -4.11463300 | -2.49333800 |
| C | 3.61683200  | -3.54804900 | -0.71780200 |
| C | 3.15152000  | -4.66724000 | -3.22223600 |
| H | 1.06945600  | -4.16852800 | -2.86269900 |
| C | 4.67994900  | -4.09478800 | -1.44327100 |

|   |             |             |             |
|---|-------------|-------------|-------------|
| H | 3.80500400  | -3.11370100 | 0.26707000  |
| C | 4.45326600  | -4.65516500 | -2.70611600 |
| H | 2.95949600  | -5.11188900 | -4.20371600 |
| H | 5.68991900  | -4.07711800 | -1.02331300 |
| H | 5.28195300  | -5.07761000 | -3.28137200 |
| C | 0.16104000  | -4.14644700 | 0.10205700  |
| N | -0.62227200 | -4.72338600 | -0.93247200 |
| H | -1.27642000 | -3.99127500 | -1.23137800 |
| C | 1.08346700  | -5.22171900 | 0.72792200  |
| C | 1.89353000  | -4.95586400 | 1.84497900  |
| C | 1.14557300  | -6.50134000 | 0.16070000  |
| C | 2.74878400  | -5.93045900 | 2.36932000  |
| H | 1.85502800  | -3.96976900 | 2.31449700  |
| C | 1.99943400  | -7.48295700 | 0.67836200  |
| H | 0.49229200  | -6.67478400 | -0.69543700 |
| C | 2.80914800  | -7.20255300 | 1.78493000  |
| H | 3.37046100  | -5.69738800 | 3.23914300  |
| H | 2.03331500  | -8.47488300 | 0.21610900  |
| H | 3.47690600  | -7.96712900 | 2.19249900  |
| C | -0.68913700 | -3.60078500 | 1.29459600  |
| C | -1.76102600 | -4.40293500 | 1.73207700  |
| C | -0.44202500 | -2.41452900 | 2.00478700  |
| C | -2.52812200 | -4.06356100 | 2.84700400  |
| H | -1.97043700 | -5.30229200 | 1.14953500  |
| C | -1.20634600 | -2.07032200 | 3.12782800  |
| H | 0.33167700  | -1.72103800 | 1.67696000  |
| C | -2.24937900 | -2.88961100 | 3.56148400  |
| H | -3.35082200 | -4.71369500 | 3.16149000  |
| H | -0.98206100 | -1.14400500 | 3.66178900  |
| H | -2.85080700 | -2.60785900 | 4.43001000  |

v)

|   |             |             |             |
|---|-------------|-------------|-------------|
| C | 4.21405000  | -0.64476500 | -2.03044100 |
| C | 4.97808900  | -0.05973400 | -1.04553100 |
| C | 2.83585000  | 0.37162500  | -0.72617100 |
| N | 2.88531100  | -0.37019200 | -1.82065600 |
| H | 4.55487800  | -1.24362900 | -2.87478600 |
| H | 6.04954600  | -0.04466300 | -0.85962100 |
| C | 4.44887300  | 1.31470200  | 0.99696900  |
| H | 5.47428600  | 1.69533100  | 0.90150500  |
| H | 3.76013100  | 2.15590100  | 1.13219500  |
| H | 4.39519900  | 0.65409400  | 1.87618100  |
| N | 4.09103500  | 0.59409300  | -0.21788500 |
| C | 1.57342500  | 0.93206800  | -0.09610000 |
| O | 1.71262200  | 2.36569300  | 0.00748700  |
| C | 1.27347400  | 0.42819300  | 1.34416900  |
| H | 2.02287800  | -0.29179200 | 1.69564700  |
| H | 1.29830400  | 1.29657700  | 2.01404100  |
| C | -0.13973200 | -0.19592400 | 1.29502700  |
| H | -0.71969100 | 0.08565200  | 2.18103300  |
| C | -0.14679000 | -1.71322000 | 1.23250700  |
| C | 0.76257800  | -2.43680000 | 0.44222600  |
| C | -1.11141000 | -2.42933000 | 1.95876900  |

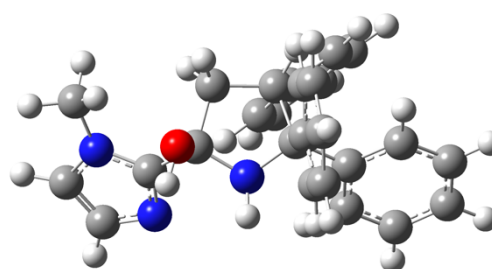



|   |             |             |             |
|---|-------------|-------------|-------------|
| C | 0.70400100  | -3.83249200 | 0.38139700  |
| H | 1.50649200  | -1.90748200 | -0.15433700 |
| C | -1.17468200 | -3.82520100 | 1.89899500  |
| H | -1.83161500 | -1.88370900 | 2.57481100  |
| C | -0.26495300 | -4.53380700 | 1.10763200  |
| H | 1.41873000  | -4.37532600 | -0.24318000 |
| H | -1.93639500 | -4.35945800 | 2.47313500  |
| H | -0.30972000 | -5.62492600 | 1.05811500  |
| H | 1.89320000  | 2.71327800  | -0.87843800 |
| C | -0.76639100 | 0.47622200  | 0.01246100  |
| C | -1.32101500 | 1.90037000  | 0.26861200  |
| C | -1.71939600 | 2.65063700  | -0.85270900 |
| C | -1.44523100 | 2.49314300  | 1.53087800  |
| C | -2.21077200 | 3.94930500  | -0.72121300 |
| H | -1.65045700 | 2.20624200  | -1.84954100 |
| C | -1.93961000 | 3.79746500  | 1.67089400  |
| H | -1.15380400 | 1.95153200  | 2.43130100  |
| C | -2.32199300 | 4.53272400  | 0.54780200  |
| H | -2.51262500 | 4.50839700  | -1.61086700 |
| H | -2.02275100 | 4.23631600  | 2.66870100  |
| H | -2.70686500 | 5.54982400  | 0.65683000  |
| C | -1.87351700 | -0.38397700 | -0.60423500 |
| C | -1.61949800 | -1.24686600 | -1.67914100 |
| C | -3.16268100 | -0.36490500 | -0.04799000 |
| C | -2.63141300 | -2.06820900 | -2.18924600 |
| H | -0.61519500 | -1.28754700 | -2.10174600 |
| C | -4.17159700 | -1.19142300 | -0.54813300 |
| H | -3.37873000 | 0.30291600  | 0.78913500  |
| C | -3.91039600 | -2.04652800 | -1.62539000 |
| H | -2.41426600 | -2.73341200 | -3.02934400 |
| H | -5.16697400 | -1.16584300 | -0.09680300 |
| H | -4.69960500 | -2.69060300 | -2.02182100 |
| N | 0.42277600  | 0.50576300  | -0.83561000 |
| H | 0.32576200  | 0.91617100  | -1.75944800 |

3)

|   |             |             |             |
|---|-------------|-------------|-------------|
| C | 4.39991800  | 1.21598900  | 2.14048600  |
| C | 5.04775800  | 1.23151500  | 0.91936400  |
| C | 2.94520800  | 0.60519400  | 0.67713200  |
| N | 3.10568500  | 0.82487800  | 1.97977100  |
| H | 4.81398000  | 1.47167800  | 3.11578100  |
| H | 6.07074100  | 1.47077300  | 0.63857200  |
| C | 4.39202400  | 0.69129700  | -1.43444900 |
| H | 5.47659000  | 0.73901000  | -1.58931400 |
| H | 4.03273600  | -0.28161600 | -1.79263100 |
| H | 3.91773600  | 1.49060500  | -2.02025000 |
| N | 4.11663600  | 0.84663200  | -0.01079000 |
| C | 1.67414800  | 0.18884400  | 0.07226300  |
| C | 1.28419100  | 0.41161700  | -1.37978900 |
| H | 1.63082900  | 1.36942200  | -1.79033100 |
| H | 1.70772700  | -0.39133300 | -2.00516000 |
| C | -0.24937200 | 0.29514800  | -1.30320200 |
| H | -0.66394400 | -0.16779400 | -2.20474100 |

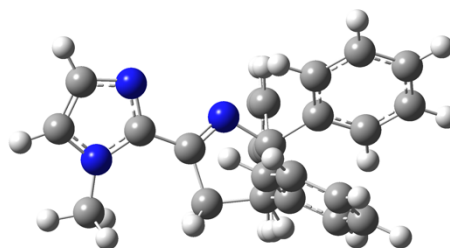

|   |             |             |             |
|---|-------------|-------------|-------------|
| C | -0.95327200 | 1.62980000  | -1.12627100 |
| C | -0.41899200 | 2.67068900  | -0.34749000 |
| C | -2.20503400 | 1.83235700  | -1.72990100 |
| C | -1.11760400 | 3.86928600  | -0.17277300 |
| H | 0.54909800  | 2.55197800  | 0.14284700  |
| C | -2.90780700 | 3.02841500  | -1.55797900 |
| H | -2.64032900 | 1.03475200  | -2.33785300 |
| C | -2.36652700 | 4.05335400  | -0.77510700 |
| H | -0.68230700 | 4.66318400  | 0.43978000  |
| H | -3.88102500 | 3.15955600  | -2.03824200 |
| H | -2.91239700 | 4.99027500  | -0.63796400 |
| C | -0.41327000 | -0.67259400 | -0.05762700 |
| C | -0.29636900 | -2.17139800 | -0.41027800 |
| C | -0.21949000 | -3.08250400 | 0.66076200  |
| C | -0.24738500 | -2.67830900 | -1.71513500 |
| C | -0.09786200 | -4.45301700 | 0.43405700  |
| H | -0.25475000 | -2.70053700 | 1.68286900  |
| C | -0.12698000 | -4.05627200 | -1.94644300 |
| H | -0.30795900 | -2.01249300 | -2.57634400 |
| C | -0.05095700 | -4.94833200 | -0.87606200 |
| H | -0.04133300 | -5.14009500 | 1.28247700  |
| H | -0.09411100 | -4.42694100 | -2.97422700 |
| H | 0.04219700  | -6.02207000 | -1.05746300 |
| C | -1.71606100 | -0.42862400 | 0.70235600  |
| C | -1.73557200 | 0.32566800  | 1.88222000  |
| C | -2.92910400 | -0.91131200 | 0.18755900  |
| C | -2.94437000 | 0.59848300  | 2.53257000  |
| H | -0.79286500 | 0.69850700  | 2.28545300  |
| C | -4.13759900 | -0.63797400 | 0.83268900  |
| H | -2.92711600 | -1.50613000 | -0.72927300 |
| C | -4.14983400 | 0.12006900  | 2.00985100  |
| H | -2.94238000 | 1.18939900  | 3.45246400  |
| H | -5.07367500 | -1.01923200 | 0.41616900  |
| H | -5.09419500 | 0.33360600  | 2.51721000  |
| N | 0.76453000  | -0.36742000 | 0.78481800  |

### III-B)

|    |             |            |             |
|----|-------------|------------|-------------|
| Rh | -0.68814100 | 1.99335700 | 0.42760100  |
| C  | -0.07168700 | 2.44500300 | 2.28687200  |
| C  | 1.07842500  | 3.14886600 | 2.67694200  |
| C  | -0.94700600 | 2.00899300 | 3.32108400  |
| C  | 1.34307400  | 3.40481600 | 4.02926900  |
| H  | 1.78336700  | 3.50530800 | 1.92190300  |
| C  | -0.69111700 | 2.27324500 | 4.67768400  |
| C  | 0.45960700  | 2.97554300 | 5.03221700  |
| H  | 2.25027700  | 3.94939600 | 4.30723700  |
| H  | -1.37908900 | 1.91881000 | 5.45060800  |
| H  | 0.67445500  | 3.18402700 | 6.08279300  |
| C  | -1.74126200 | 3.69530300 | 0.49162600  |
| C  | -1.07828200 | 4.81780800 | -0.08300100 |
| C  | -3.04310000 | 3.90014800 | 0.97511600  |
| C  | -1.68696600 | 6.08293100 | -0.16374700 |
| C  | -3.65197100 | 5.15950100 | 0.89423000  |

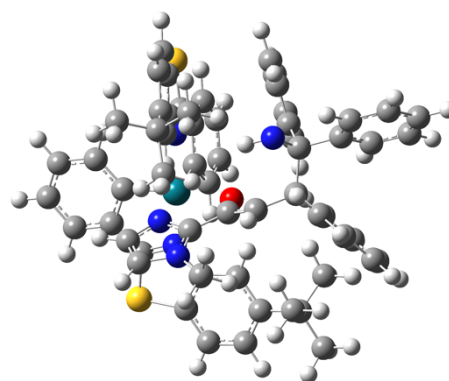

|   |             |             |             |
|---|-------------|-------------|-------------|
| H | -3.59935700 | 3.07388300  | 1.42254200  |
| C | -2.97907400 | 6.25383000  | 0.32930500  |
| H | -1.15323500 | 6.92531000  | -0.61326600 |
| H | -4.66763900 | 5.29099400  | 1.27862500  |
| H | -3.46408700 | 7.23097300  | 0.27339500  |
| C | -2.04797400 | 1.20793800  | 2.82982600  |
| C | -3.89098700 | -0.34573300 | 2.33209800  |
| C | -3.10414100 | 0.02813900  | 1.22060900  |
| C | -4.91973000 | -1.28315000 | 2.19285300  |
| C | -3.34389400 | -0.55025200 | -0.03485000 |
| C | -5.13090900 | -1.85226500 | 0.93943200  |
| H | -5.53151800 | -1.57668500 | 3.04794700  |
| C | -4.34667300 | -1.50857200 | -0.19112800 |
| H | -2.72035500 | -0.23647800 | -0.86131200 |
| H | -5.92656100 | -2.59272000 | 0.83960400  |
| C | 0.24554500  | 4.50452800  | -0.58205400 |
| C | 2.49676400  | 4.24737500  | -1.55765400 |
| C | 1.94140700  | 3.06904300  | -1.00598300 |
| C | 3.76057800  | 4.22126600  | -2.14945200 |
| C | 2.65132500  | 1.86430800  | -1.04858200 |
| C | 4.44941200  | 3.00612700  | -2.19360800 |
| H | 4.20216900  | 5.12458900  | -2.57464200 |
| C | 3.91166100  | 1.81379800  | -1.65531300 |
| H | 2.17637400  | 0.98769300  | -0.61023100 |
| H | 5.43064000  | 2.99960600  | -2.66712900 |
| S | -3.32093800 | 0.47332200  | 3.77299200  |
| S | 1.37404900  | 5.58610400  | -1.36707700 |
| N | 0.67821600  | 3.26170500  | -0.46626800 |
| N | -2.09840500 | 0.92985200  | 1.53575000  |
| C | 4.63059600  | 0.45526300  | -1.75165200 |
| C | 4.70008700  | -0.20197800 | -0.35452200 |
| H | 5.23944600  | -1.16091100 | -0.41269700 |
| H | 5.23296900  | 0.44504600  | 0.36031200  |
| H | 3.69930500  | -0.40801400 | 0.05378000  |
| C | 6.06387600  | 0.58973900  | -2.29419100 |
| H | 6.54414900  | -0.40073400 | -2.32173000 |
| H | 6.07960400  | 0.99057000  | -3.31959700 |
| H | 6.68063300  | 1.24473900  | -1.65836400 |
| C | 3.82322900  | -0.45604700 | -2.70620000 |
| H | 2.80498900  | -0.63701900 | -2.32844900 |
| H | 3.74241900  | 0.00000800  | -3.70616000 |
| H | 4.31542200  | -1.43557300 | -2.81326600 |
| C | -4.61472400 | -2.18501400 | -1.54775500 |
| C | -3.58170400 | -1.76764000 | -2.61074600 |
| H | -3.60932800 | -0.68605500 | -2.81382400 |
| H | -2.55741200 | -2.03065500 | -2.30533800 |
| H | -3.79187300 | -2.28705700 | -3.55823400 |
| C | -6.02135700 | -1.77943600 | -2.04228800 |
| H | -6.80558400 | -2.08498300 | -1.33253900 |
| H | -6.09000600 | -0.68786900 | -2.17540100 |
| H | -6.23919500 | -2.25761100 | -3.01129600 |
| C | -4.54528000 | -3.72100100 | -1.38561100 |
| H | -3.55588100 | -4.03526900 | -1.01921400 |
| H | -5.30394200 | -4.09585800 | -0.68208300 |

|   |             |             |             |
|---|-------------|-------------|-------------|
| H | -4.72475000 | -4.21094200 | -2.35638400 |
| C | 0.08753800  | -0.50601700 | -1.05432900 |
| C | 0.33381000  | -1.82060600 | -1.33989600 |
| H | -0.03963300 | -2.22505400 | -2.27679300 |
| O | 0.40703000  | 0.10755300  | 0.05512700  |
| C | 1.09307100  | -2.78438600 | -0.46378800 |
| C | -0.63197800 | 0.35265600  | -2.03425000 |
| N | -0.80678600 | 0.25362100  | -3.38669400 |
| C | -1.83714100 | 2.07049700  | -2.65715900 |
| C | -1.57462800 | 1.33133800  | -3.78633600 |
| H | -2.39563100 | 2.99728700  | -2.54958800 |
| H | -1.85031900 | 1.47875800  | -4.82712200 |
| N | -1.24588100 | 1.45152100  | -1.58995800 |
| C | -0.26605000 | -0.74687200 | -4.29661300 |
| H | 0.76486900  | -0.99042400 | -4.01034600 |
| H | -0.87132300 | -1.66527700 | -4.27916800 |
| H | -0.27188700 | -0.33643500 | -5.31388500 |
| H | 1.83795800  | -2.22093800 | 0.11053300  |
| C | 1.84326500  | -3.76654400 | -1.34946200 |
| C | 1.15937200  | -4.66089400 | -2.19051000 |
| C | 3.24489400  | -3.77426100 | -1.37152200 |
| C | 1.85640100  | -5.53095800 | -3.03205700 |
| H | 0.06679300  | -4.68383000 | -2.16718500 |
| C | 3.94919100  | -4.64167400 | -2.21425800 |
| H | 3.79339600  | -3.08925000 | -0.72137300 |
| C | 3.25702700  | -5.52350400 | -3.04974600 |
| H | 1.30457900  | -6.22226400 | -3.67471900 |
| H | 5.04239500  | -4.62706400 | -2.21534800 |
| H | 3.80350800  | -6.20398500 | -3.70787700 |
| C | 0.17257400  | -3.54549900 | 0.63235000  |
| N | -1.10199500 | -3.80761800 | 0.01050300  |
| H | -1.50384700 | -2.87851900 | -0.18502200 |
| C | 0.85228300  | -4.85538400 | 1.06873500  |
| C | 2.09291200  | -4.81963400 | 1.72713500  |
| C | 0.26510100  | -6.10265300 | 0.82064400  |
| C | 2.73411800  | -5.99717000 | 2.11650900  |
| H | 2.56664700  | -3.85857100 | 1.93796000  |
| C | 0.90239100  | -7.28558100 | 1.21458700  |
| H | -0.69672300 | -6.13872800 | 0.30911800  |
| C | 2.14012600  | -7.23971600 | 1.86194600  |
| H | 3.70175400  | -5.94496400 | 2.62273900  |
| H | 0.42628100  | -8.24879700 | 1.01115800  |
| H | 2.63892800  | -8.16285800 | 2.16836200  |
| C | -0.05682800 | -2.71531800 | 1.92045600  |
| C | -1.17200900 | -3.04732300 | 2.71318200  |
| C | 0.82891000  | -1.74042800 | 2.39963800  |
| C | -1.39158000 | -2.42824200 | 3.94481200  |
| H | -1.86862700 | -3.81276300 | 2.36379800  |
| C | 0.61384000  | -1.12387700 | 3.63622400  |
| H | 1.68408300  | -1.42725500 | 1.80509600  |
| C | -0.49253200 | -1.46684100 | 4.41631200  |
| H | -2.27157900 | -2.69469400 | 4.53523600  |
| H | 1.30781000  | -0.35362100 | 3.98121300  |
| H | -0.66441200 | -0.97201100 | 5.37496300  |
